# Supplementary material
Source: Royal Society of Chemistry journal article supplement (https://www.rsc.org/suppdata/ft/1998/3111/f805190i.doc)
Supplement: Supplementary file 1 [file f805190i.doc]

**Table 4. Enthalpies of solution of free and complex alkali-metal salts (lithium and sodium) as a function of the elctrolyte concentration (molar scale) at 298.15 K**

| **[LiEtCalix(4)]CF3SO3** | **[LiEtCalix(4)]I** |
| --- | --- |
| c sH  mol dm-3 kJ mol-1 | c sH  mol dm-3 kJ mol-1 |
| 3.47*10-4 -24.43 | 6.39*10-4 -19.15 |
| 6.16*10-4 -25.38 | 8.30*10-4 -19.99 |
| 6.48*10-4 -27.04 | 9.21*10-4 -19.48 |
| 7.88*10-4 -30.12 | 1.08*10-3 -19.96 |
| 1.10*10-3 -31.53 | 2.12*10-3 -18.85 |
| sH0 = -14  2 kJ mol-1 a | sH0 = -19.5  0.5 kJmol-1 b |

| **[LiEtCalix(4)]Br** | **[LiEtCalix(4)]AsF6** | **[LiEtCalix(4)]BF4** |
| --- | --- | --- |
| c sH  mol dm-3 kJ mol-1 | c sH  mol dm-3 kJ mol-1 | c sH  mol dm-3 kJ mol-1 |
| 4.68*10-4 -29.65 | 3.49*10-4 -19.29 | 2.20*10-4 -21.08 |
| 6.57*10-4 -27.51 | 5.93*10-4 -17.63 | 2.80*10-4 -18.77 |
| 8.62*10-4 -29.19 | 6.83*10-4 -17.02 | 3.24*10-4 -19.87 |
| 1.06*10-3 -31.29 | 8.80*10-4 -17.41 | 4.69*10-4 -22.47 |
| 1.23*10-3 -30.99 | 9.14*10-4 -15.80 | 5.89*10-4 -21.51 |
|  | 1.00*10-3 -17.17 | 5.98*10-4 -21.76 |
|  |  | 1.19*10-3 -21.88 |
|  |  | 2.00*10-3 -19.91 |
|  |  | 3.19*10-3 -21.96 |
| sH0 = -29.71.5 kJmol-1 b | sH0 = -22.5  1.8 kJ mol-1 a | sH0 = -21.01.2 kJ mol-1 b |

**Table 4 continued….**

| **[Li222]CF3SO3** | **[Li222]BF4** |
| --- | --- |
| c sH  mol dm-3 kJ mol-1 | c sH  mol dm-3 kJ mol-1 |
| 2.24*10-4 21.90 | 3.26*10-4 10.31 |
| 3.52*10-4 22.29 | 3.35*10-4 11.01 |
| 3.96*10-4 22.52 | 5.11*10-4 11.26 |
| 4.32*10-4 23.01 | 7.86*10-4 13.95 |
| 5.10*10-4 23.42 | 8.75*10-4 12.44 |
| 6.33*10-4 25.09 | 1.43*10-3 15.76 |
| 8.24*10-4 24.22 | 2.03*10-3 16.02 |
| sH0 = 18.4 1.2 kJ mol-1 a | sH0 = 6.7  0.9 kJ mol-1 a |

| **[Li222]I** | **[Li222]ClO4** |
| --- | --- |
| c sH  mol dm-3 kJ mol-1 | c sH  mol dm-3 kJ mol-1 |
| 4.97*10-4 7.05 | 2.40*10-4 21.34 |
| 5.95*10-4 6.63 | 4.15*10-3 20.39 |
| 7.14*10-4 5.19 | 5.48*10-4 22.51 |
| 1.03*10-3 4.02 | 6.96*10-4 19.06 |
| 1.39*10-3 3.81 | 8.81*10-4 21.16 |
| sH0 = 11.8 1.4 kJ mol-1 a | sH0 = 20.9  1.3 kJ mol-1 b |

**Table 4 continued…**

| **[NaEtCalix(4)]CF3SO3** | **[NaEtCalix(4)]I** | **[NaEtCalix(4)]BF4** |
| --- | --- | --- |
| c sH  mol dm-3 kJ mol-1 | c sH  mol dm-3 kJ mol-1 | c sH  mol dm-3 kJ mol-1 |
| 5.01*10-4 -35.77 | 6.66*10-4 -40.63 | 4.45*10-4 -39.76 |
| 8.02*10-4 -31.76 | 7.29*10-4 -40.94 | 6.31*10-4 -41.42 |
| 1.17*10-3 -34.69 | 8.73*10-4 -41.55 | 8.45*10-4 -38.75 |
| 1.38*10-3 -32.69 | 1.06*10-3 -44.89 | 1.12*10-3 -43.58 |
| 1.91*10-3 -30.88 |  | 1.32*10-3 -39.64 |
| sH0 = -38.0  1.6 kJ mol-1 a | sH0 = -24.3  1.2 kJ mol1 a | sH0 = -40.61.9 kJ mol-1 b |

| **Na B4F** | Na I |
| --- | --- |
| c sH  mol dm-3 kJ mol-1 | c sH  mol dm-3 kJ mol-1 |
| 1.48*10-3 0.23 | 3.75*10-3 -27.71 |
| 1.76*10-3 0.18 | 6.14*10-3 -27.50 |
| 2.28*10-3 0.17 | 8.67*10-3 -27.02 |
| 3.00*10-3 0.23 | 1.13*10-2 -27.78 |
| 5.00*10-3 0.12 | 1.39*10-2 -26.56 |
| 1.30*10-2 0.31 |  |
| 2.42*10-2 0.26 |  |
| sH0 = 0.320.03 kJ mol-1 a | sH0 = -27.30.5 kJ mol-1 b |

**Table 4 continued…**

| **Na CF3SO3** | **Na Br** | **[Na 222]ClO4** |
| --- | --- | --- |
| c sH  mol dm-3 kJ mol-1 | c sH  mol dm-3 kJ mol-1 | c sH  mol dm-3 kJ mol-1 |
| 1.87*10-3 -11.79 | 3.11*10-4 -1.60 | 3.46*10-4 11.49 |
| 2.63*10-3 -11.73 | 6.28*10-4 -1.60 | 5.30*10-4 13.79 |
| 3.97*10-3 -11.84 | 1.38*10-3 -0.66 | 7.06*10-4 12.70 |
| 5.17*10-3 -10.69 | 1.77*10-3 0.13 | 9.17*10-4 12.92 |
| 6.72*10-3 -11.35 |  | 1.20*10-3 12.44 |
|  |  | 1.51*10-3 12.73 |
|  |  | 2.03*10-3 13.91 |
| sH0 = -11.50.5 kJ mol-1 b | sH0 = -3.10.6 kJ mol-1 a | sH0 = 12.80.8 kJ mol-1 b |

a Extrapolated b Average value
